# Supplementary material for: Genome-Wide Analysis of Binding Sites and Direct Target Genes of the Orphan Nuclear Receptor NR2F1/COUP-TFI
Source: PLoS One. 2010 Jan 27;5(1):e8910. doi: 10.1371/journal.pone.0008910 (PMC2811727; doi:10.1371/journal.pone.0008910)
Supplement: Table S2 — HMM training sites. Complete description of the 49 COUP-TF response elements used to calculate the COUP-TF HMM parameters. The included fields are, from left to right: name of the sequence, Locus Link number, gene name, brief gene description, species, competing elements or cofactors (as described in the literature), final HMM training sequence (formatted as described in the Methods section), type of binding site (determined as described in the Methods section), orientation of the response element (plus or minus strand), position within the gene/promoter (as described in the literature), activation or repression by COUP-TF, specific tissues/cells that the experiments were performed in, list of experimental assays performed, absolute genomic coordinates (4 columns), OMIM link and Jackson lab ID number. Genomic coordinates correspond to the galGal3, hg18, mm9, rn4, and StrPur2 assemblies. (0.04 MB XLS) [file pone.0008910.s003.xls]

## Sheet: Supplementary File 2.txt
														Chromosomal coordinates
	seq_name	Locus Link	Gene name	Description/Aliase	Species	Competing element/ cofactor	HMM training sequence	HMM type of site	Half-site orientation	Position within gene	Activation/ Repression	Tissue/ cells	Assays	Chr	Strand	Start	End	OMIM	Jackson Lab	Reference
	ch_ova	396058	LOC396058	Ovalbumin	Chicken		tggGCGTCAaAGGTCAaac	Dr1	plus	-70 to -90	Activator	HeLa	EMSA, footprinting, invitro transcriptional system and RNase mapping	2	-	68913560	68913572			Sagami et al, MCB 1986; Hwung et al, JBC 1988.
	ch_apo-vdlii	396476	APOVLDLII	Apolipoprotein VLDLII	Chicken		gcaGGACCTtTGACCCctc	Dr1	minus	-62 to -43		Chicken embryonic hepatocytes	EMSA, supershift	1	-	86533294	86533306			Beekman et al, Nuclei Acids Res 1991; Wijnholds et al, Nucleic Acids Res 1991.
	hu_lhr	3973	LHCGR	Luteinizing hormone/choriogonadotropin receptor	Human	TR4 ñ only in human	cgcAGGTCAAGGCAGagc	Dr0	plus	human: -176 to -145	Repressor	rat granulosa cells, CV-1, JAR	yeast one-hybrid, EMSA, supershift, luciferase assay, scatchard analysis. COUP-TF-I	2	-	48836474	48836485	152790	MGI: 96783	Zhang et al, Mol Endocrinol, 2001; Zhang et al, JBC 2000.
	hu_apoAi.1	335	APOA1	Apolipoprotein A-I	Human	Human	agcTGATCCtTGAACTctt	Dr1	minus	-137 to -100	Repressor	Liver	EMSA, CAT assay, correlated ARP-1mRNA levels with target levels through aging. Oligo C. COUP TF-II	11	-	116213667	116213679	*107680	MGI:† 88049†	Ladias et al, Science, 1991; Nakamura et al, J Lipid Res, 1999.
	hu_col7a1	1294	COL7A1	Collagen type VII, alpha 1	Human	Smad	gcgGGACCCaTGGCCTgag	Dr1	minus	-456 to -440	Repressor	NIH3T3, Cos-1, HaCaT	Luciferase assay with library screening, (mutations in the COUP site). DNA-protein pull-down. Luciferase assay with increasing amounts of COUP I and II and wt and mt that increase and decrease binding.	3	-	48608132	48608144	*120120	MGI:† 88462†	Calonge et al, JBC 2004.
	hu_cyp2d6	1565	CYP2D6	cytochrome P450, family 2, subfamily D, polypeptide 6	Human	HNF4	cagAGGGCGaAGGCCAtca	Dr1	plus	-69 to -28	Repressor	HepG2, Cos7	EMSA, ab supershift, CAT assay (mutations)	22	-	40870540	40870552	124030	MGI:† 1929474	Cairns et al, JBC 1996.
	hu_penk1	5179	PENK	Preproenkephalin A	Human		gccTGGCCCgTGACCCcgc	Dr1	minus	First, untranslated exon, +22 to +52	Repressor	HeLa, CV1, NG108-15	CAT assay (deletions and mutations of segment), DNAse I protection assay, EMSA (supershift was done with ARP ab), methylation interference.	8	-	57521707	57521719	*131330	MGI:† 104628	Chan et al, Mol Brain Res 1997.
	hu_ppara	5465	PPARA	Peroxisome proliferative activated receptor, alpha	Human	HNF-4	ggtGGGGCAaAGTTCAcca	Dr1	plus	-1492 to -1483	Repressor	HepG2, Cos	Gel shift, Luciferase with deletion and mutational analysis. COUP-TFII	22	+	44923869	44923881	170998	MGI:† 104740	Pineda Torra et al, Mol Endocrinol 2002.
	hu_rxrg2	6258	RXRg2		Human	RXR	tggGGTTGAaAGGTCAgat	Dr1	plus	-100 to -86	Repression	CV1	EMSA, luciferase assay	1	-	163660947	163660959	*180247		Barger, JBC 1997.
	hu_apoAi.2	335	APOA1	Apolipoprotein A-I	Human	Human	cacTGAACCctTGACCCctg	Dr2	minus	from -214 to -192	Repressor	Liver	EMSA, methylation interference, CAT assay, correlated ARP-1mRNA levels with target levels through aging. Oligo A. COUP TF-II	11	-	116213744	116213757	*107680	MGI:† 88049†	Ladias et al, Science, 1991; Nakamura et al, J Lipid Res, 1999.
	hu_apoB	338	APOB	Apolipoprotein B	Human		ggCGCCCTttGGACCTttt	Dr2	minus	-80 to -60			EMSA	2	-	21120515	21120528	107730	MGI: 88052	Ladias et al, Science, 1991.
	hu_serpinC1	462	SERPINC1	antithrombin	Human	HNF4, RXR	tcaTCAGCCttTGACCTcag	Dr2	minus	-92 to -68	Repression	HepG2, BSC40, Cos-1	Luciferase with deletion constructs, footprint, EMSA (wt and mt probes), ab supershift. First 3 nucleotides if deleted, retain binding.	1	-	172153163	172153176	107300	MGI:† 88095	Fernandez-Rachubinsky et al, JBC 1993.
	hu_epo-e	2056	EPO	erythropoietin	Human	HNf4	gtcTGACCTctCGACCCtac	Dr2	minus	143 to 178 past polyA	Repression	Hep3B	EMSA, ab supershift, luciferase assay. Underlined: defined as hexanucleotide repeats in paper.	7	+	100159403	100159416	*133170	MGI: 95407	Galson et al, MCB 1995.
	hu_epo-p	2056	EPO	erythropoietin	Human	HNF4	ctcTGACCCcgggTGGCCCcta	Dr4	minus	-118 to -65	Repression	Hep3B	EMSA, ab supershift, luciferase assay. Underlined: defined as hexanucleotide repeats in paper.	7	+	100156191	100156206	*133170	MGI: 95407	Galson et al, MCB 1995.
	hu_rarb	5915	RARb		Human	RAR	gagTGAACTttcggTGAACCcta	Dr5	minus	promoter	Represses basal transcription, (sensitizing to RA responsiveness)	CV-1, human lung cancer cell lines	EMSA, CAT assay	3	-	25444705	25444721	*180220	MGI: 97857	Wu et al, EMBO J 1997.
	hu_ccd	7356	SCGB1A1	Secretoglobin, family 1A, member 1; Clara-cell specific 10-kD protein	Human		tcaAGGCCAttgggAGGTCAagt	Dr5	plus	-888 to -551	Repressor	A549	One-hybrid, gel shift & supershift, reporter assay (SEAP)	11	+	61942399	61942415		MGI:† 98919	Navab et al, Am J Respir Cell Mol Biol 2002.
	hu_cyp11b2	1585	CYP11B2	cytochrome P450, family 11, subfamily B, polypeptide 2	Human		tggGGGCCTccagcctTGACCTtcg	Dr7	minus	-129 to -114	Activates		EMSA (reported to have higher affinity compared to nuclear receptor half-site)	8	-	143996379	143996397	124080	MGI: 88584	Zeitoun et al, Mol Endocrinol 1999; Shibata et al, J Steroid Biochem Mol Biol 2003.
	hu_lcad.2	33	ACADL	Long chain acyl-CoA dehydrogenase.	Human		tacAGGTGAgtaaatggaGGTTTAca	Dr9	plus	from -1010 to -1048	Repressor	hepG2	CAT reporter assay (just show that that promoter fragment represses), EMSA and supershift.	2	-	210799436	210799456	#201460, *609576	MGI: 87866	Zhang et al, Biochim Biophys Acta 1997.
	hu_hbv		HBV		Human virus	HNF4a	attAGGTTAaAGGTCTttg	Dr1	plus	1750 to 1785	Repressor of both pre-C and pregenomic RNA	Huh7 (human hepatoma cell line), HeLa, HepG2	Cell-free transcription assay, primer extension of transfected cells, EMSA, supershift							Yu et al, J Virol 2003; Yu et al, J Virol 1997.
	mu_dax1	11614	Nr0b1	Dax-1	Mouse	SF1	tcgAGGTCATGGCCAcac	Dr0	plus	-125 to -115	Repressor	JEG-3	EMSA, ab supershift (mutations); Luciferase assay (mutation of the site increases basal activity, did not transfect COUP)	X	+	83436988	83436999	*300473	MGI: 1352460†	Yu et al, Mol Endocrinol, 1998.
	mu_pepck.2	18534	Pck1	PEPCK; phosphoenolpyruvate carboxykinase 1, cytosolic	Mouse	HNR4	gccTGCCCTTGACCCcca	Dr0	minus	from -337 to -321 (AF3)	Activator	H4IIE rat hepatoma cells, rat liver nuclear extract	Luciferase (includes mutations, shifting positions, replacing by COUP consensus site), CAT assay, ChIP (GRU), EMSA, ab supershift.	2	+	172978243	172978254	261680	MGI:† 97501†	Herzog et al, Mol Endocrinol 2004; Hall et al, PNAS 1995; Scott et al, JBC 1996.
	mu_bmp4.1	12159	Bmp4	Bone morphogenic protein-4	Mouse		gttGGGCCAaAGGTCActt	Dr1	plus	at -2095 (DR-1A distal)	Repressor	Fetal rat calvarial osteoblasts	EMSA, supershift, CAT assay	14	-	47012382	47012394	*112262	MGI:† 88180	Feng et al, JBC 1995.
	mu_bmp4.2	12159	Bmp4	Bone morphogenic protein 4	Mouse		aagGGGCCAaAGGGCActt	Dr1	plus	at -865 (DR-1A proximal)	Repressor	Fetal rat calvarial osteoblasts	EMSA, supershift, CAT assay	14	-	47011147	47011159	*112262	MGI:† 88180	Feng et al, JBC 1995.
	mu_mhcI	15064	Mr1	Major histocompatibility complex, class I-related	Mouse	NFkB	gtgAGGTCAgGGGTGggg	Dr1	plus	-199	Repressor	Ad12- transformed cell line	ChIP + Site specific mutagenesis (bold bases abolish binding). COUP-TFII in adenovirus type 12 infected cells.	17	-	34137419	34137430	*600764	MGI:† 1195463†	Zhao et al, Virology 2003.
	mu_ltf	17002	Ltf	lactoferrin	Mouse	ER	taaGTGTCAcAGGTCAagg	Dr1	plus	-320 to -359	Repressor	RL 95-2 cells	EMSA, supershift, footprinting, CAT assay	9	+	110921449	110921461	*150210	MGI:† 96837	Kimura et al, JBC 1993.
	mu_mtp	17777	Mttp	Microsomal triglyceride transfer protein	Mouse	RXRa	atcTGACCTtTCCCCTata	Dr1	minus	136 bp proximal in promoter: -51 to -48	Repressor	L35 cells, FAO hepatoma cells	Yeast one-hybrid, Luciferase assay (includes point mutations), EMSA with supershift. COUP-TFII	3	-	137794370	137794382	*590075	MGI:† 106926†	Kang et al, JBC 2003.
	mu_pepck.1	18534	Pck1	PEPCK; phosphoenolpyruvate carboxykinase 1, cytosolic	Mouse	HNF4	tcaTGACCTtTGGCCGtgg	Dr1	minus	from -451 to -440 (AF1)	Activator	H4IIE rat hepatoma cells, rat liver nuclear extract	Luciferase (includes mutations, shifting positions, replacing by COUP consensus site), CAT assay, ChIP (GRU), EMSA, ab supershift.	2	+	172978124	172978136	261680	MGI:† 97501†	Herzog et al, Mol Endocrinol 2004; Hall et al, PNAS 1995; Scott et al, JBC 1996.
	mu_oct4	18999	Pou5f1	POU domain, class 5, transcription factor 1; Oct-4	Mouse	RARa/RXRa; RARb/RXRb; RARb/RXRa	gcgGGGCCAgAGGTCAagg	Dr1	plus	-412 to +39	Repression	P19	CAT assay (mutations);EMSA (mutations); DNAse I footprinting; Kd calculation	17	+	35642936	35642949	*164177	MGI:† 101893††	Ben-Shushan, MCB 1995.
	mu_pthr	19228	Pthr1	PTH/PTHrP (parathyroid related protein) receptor	Mouse	RXRa	ccaAGGTCAgAGTTCAgcc	Dr1	plus	-2714 to -2702 in the P2 promoter (upstream of exon U3)	Activation	P19	Luciferase activity; Gel-shift (mutations also), transgenic mouse embryos with reporter gene	9	-	110648929	110648941	*168468	MGI:† 97801†	Karperien, Mol Endocrinol 1999.
	mu_hadhb	74147	Ehhadh	enoyl-Coenzyme A, hydratase/3-hydroxyacyl Coenzyme A dehydrogenase	Mouse	HNF4	cttTGACCTacTGAACTatt	Dr2	minus	5í flanking	Repressor. COUP-TFII is an activator but only in yeast.	H4IIEC3 (rat hepatoma); HeLa; BSC40	EMSA (included mutant probes), Ab supershift; Luciferase assay (for competition purposes, no mutations). First two repeats necessary for COUP-TFI binding.	16	-	21790693	21790706	*607037	MGI:†† 1277964	Miyata et al, JBC 1993; Marcus et al, Mol Cell Endocrinol 1996.
	mu_camkiv	12326	Camk4	Calcium/calmodulin-dependent protein kinase IV	Mouse	TR/RXR and RAR/RXR	caaAGGTGAgtcAGGTCAgca	Dr3	plus	-750 to -700	Represses T3 induction and augments RA response	ES cells differentiated into neurons	CAT assay (point mutations in binding site), EMSA (competed with wt and mt probes), supershift	18	+	33098306	33098320	*114080	MGI:† 88258††	Liu et al, Mol Endocrinol 2002.
	mu_hgf	15234	Hgf	Hepatocyte growth factor	Mouse	ER	acaAGGTCAgaaAGACCAtta	Dr3	plus	-871 to -860	Repression	Liver cells, NIH3T3 cells, HepG2, RL95-2	CAT activity; Gel shift, tested deletions in promoter and mutations; HGF-CAT transgenic mice; element was also cloned upstream of SV40 promoter	5	+	16058811	16058825	*142409	MGI:† 96079	Jiang et al, JBC 1997.
	mu_myog	17928	Myog	Myogenin	Mouse	TR/RXR	ggtAGGTCTttagGGGTCTcat	Dr4	plus	-526 to -494	Repression	C2C12	COUP-TFII. EMSA, competition with mutant probes, mRNA levels upon consitutive overexpression of COUP-TFII.	1	+	136186063	136186078	*159980	MGI:97276	Muscat et al, Nucleic Acid Res 1995.
	ra_lhr	25477	Lhcgr	Luteinizing hormone/choriogonadotropin receptor	Rat		tccAGGTCAAGGAAAgca	Dr0	plus	rat: -181 to -158 (binds with lower affinity)	Repressor	rat granulosa cells, CV-1, JAR	yeast one-hybrid, EMSA, supershift, luciferase assay, scatchard analysis. COUP-TF-I					152790	MGI:† 96783†	Zhang et al, Mol Endocrinol, 2001; Zhang et al, JBC 2000.
	ra_oxytocin	25504	Oxt	Oxytocin	Rat	ER	cggTGACCTTGACCCcag	Dr0	minus	-169 to -155	Repression	P19EC	DNAse I footprinting; EMSA, ab supershift; Luciferase assay (including a mutation that separates ER from COUP responses)	3	+	118194048	118194059	*167050	MGI:†† 97453†	Burbach et al, JBC, 1994.
	ra_grik5	24407	Grik5	Glutamate receptor, ionotropic, kainate 5	Rat		ctgTAGCCTcTGACCTttc	Dr1	minus	First intron: +3206 to +3232	Repressor	Rat brain nuclear extracts, CV1, rat CG4	CAT assays, EMSA, ab supershift	1	-	80380913	80380925	*600283	MGI:† 95818††	Chew et al, JBC 1999.
	ra_ins	24506	Ins2	Insulin II	Rat		caaAGTCCAgGGGTCAggg	Dr1	plus	-60 to -40	(Repressor?)	HeLa, HIT	EMSA, footprinting, copurification of COUP by DNA affinity chromatography. Bold, marks the limit of strong protection (left) and weak protection.	1	-	202936605	202936617		MGI:† 96573	Hwung et al, Mol Cell Biol 1998.
	ra_me	24552	Me1	Malic Enzyme	Rat	PPARa/RXRa	tctGGGTCAaAGTTGAtcc	Dr1	plus	-490 to +31	Repressor		EMSA, CAT assay (with increasing levels of COUP)	8	-	91956280	91956292	*154250	MGI:† 97043	Baes et al, Biochem Biophys Res Commun 1995; Castelein et al, JBC 1994.
	ra_otc	25611	Otc	ornithine transcarbamylase	Rat	HNF4	actTGAACTtTAAGCCtaa	Dr1	minus	-100 to -113	Repressor	Liver nuclear extracts, COS7, HepG2	DnaseI footprinting, EMSA, supershift, CAT assay (deletion constructs). Found to bind enhancer sites I and IV through EMSA, and sites B and C of promoter, but only site B correlates with reporter gene activity	X	+	24685428	24685440	*300461	† MGI:† 97448	Kimura et al, JBC 1993.
	ra_hmgCoAs	29637	Hmgcs1	mitochondrial HMG-CoA synthase	Rat	HNF4	ctgAGACCTtTGGCCCagt	Dr1	minus	-104 to -92 (repression, PPARE site). To activate requires -62 to +28, but thereís no direct binding.	Repressor in Leydig tumor, activates in HepG2	Rat leydig tumor (R2C);HepG2	CAT assays (mutated PPARE), EMSA	2_random	-	3022520	3022532	*142940	MGI:† 107592††	Rodriguez et al, Biochem J 1997.
	ra_hpx	58917	Hpx	hemopexin	Rat		tttTAGACTtTGACCTttt	Dr1	minus	-145 to -125	Repression	HepG2	CAT assays;EMSA (mutations), ab supershift	1	-	163327147	163327159	*142290	MGI:† 105112†	Satoh, JBC 1994.
	ra_mtp	310900	Mttp	Microsomal triglyceride transfer protein	Rat	RXRa	atcTGACCTtTCCCCTata	Dr1	minus	135 bp proximal in promoter: -51 to -48	Repressor	L35 cells, FAO hepatoma cells	Yeast one-hybrid, Luciferase assay (includes point mutations), EMSA with supershift. COUP-TFII	2	-	235654870	235654882	*157147	MGI:† 106926†	Kang et al, JBC 2003.
	ra_aox		Acox	Acyl-CoA oxidase	Rat	PPARa/HNF-4	acgTGACCTtTGTCCTggt	Dr1	minus	from -578 to -542	Repressor	HepG2	EMSA, luciferase					*609751	MGI:† 1330812	Nishiyama, J Biochem (Tokyo) 1998.
	ra_cyp17a1	25146	Cyp17a1	Cytochrome P450, family 17, subfamily a, polypeptide 1	Rat	SF-1	gacTAACCTttgaagatctcttTCTCCTcaa	Dr13	minus	-432 to -399	Repressor	MA-10 cells	EMSA, DNAse footprint, luciferase assay	1	-	251971856	251971880	*609300	MGI:† 88586††	Mellon et al, EndocrRes 1998; Zhang et al, Mol Endocrinol 1997.
	ra_gnrh	25194	Gnrh1	Gonadotropin-releasing hormone 1	Rat	C/EBP beta also binds	ggaAGGTTAcaAAGTCAtca	Dr2	plus	-1739 to-1718	Repressor (?: no reporter assays, proposed to mediate melatonin-induced GnRH repression)	GT1-7	EMSA, supershift, WB to confirm COUP-TFI is present	15	+	47301458	47301471	*152760	MGI:† 95789†	Gillespie et al, Neuroendocrinology 1994.
	ra_cyp3a23_2	286939	Cyp3A1	cytochrome P-450PCN; same as Cyp3a23	Rat		agaTGAACTtcaTGAACTgtc	Dr3	minus	-118 to -136	Repressor	Cos-1; H4IIE rat hepatoma	Gel shift and supershift, no reporter assays specifically to test COUP. Another group performed CAT assays and EMSA (mutations), but used a longer probe whose first 7 nucleotides don't match UCSC.	12	-	9596104	9596118		MGI:† 108441	Ogino et al, Arch Biochem Biophys, 1999.
	ra_cyp7a	25428	Cyp7A1	Cytochrome P450, family 7, subfamily a, polypeptide 1	Rat	HNF1 (rat)	cttTGGTCActcaAGTTCAagt	Dr4	plus	from -74 to -54	Activator	HepG2, Cos1	Luciferase assays with promoter mutations, transfection with increasing levels of COUP. EMSA and supershift.	5	-	19716940	19716955	*118455	MGI:† 106091†	Crestani et al, J Lipid Res 1998; Stroup et al, JBC 1997; Chen et al, Biochem Biophys Res Commun 1999.
	ra_amhc	29556	Myh6	a Myosin heavy chain (blats to myosin 6)	Rat	TR/RXR	tggAGGTGAcaggAGGACAgca	Dr4	plus	-127 to -159	Repressor	CV-1	EMSA, CAT assay	15	+	33068834	33068849	160710	MGI:† 97255†	Muscat et al, Nucleic Acid Res 1995.
	sp_actin	373296	CyIIIb	Actin (CyIIIb)	Sea urchin		attTGACCCgcTGACCTttg	Dr2	minus	-430 to -445		HeLa	EMSA	Scaffold3406	-	132588	132601			Chan et al, PNAS 1992.
