# Supplementary material for: Genome-Wide Analysis of Binding Sites and Direct Target Genes of the Orphan Nuclear Receptor NR2F1/COUP-TFI
Source: PLoS One. 2010 Jan 27;5(1):e8910. doi: 10.1371/journal.pone.0008910 (PMC2811727; doi:10.1371/journal.pone.0008910)
Supplement: Table S3 — Complete candidate inner ear COUP-TFI target database. Genes are listed in decreasing rank order. MC = HMM match within a most conserved UCSC site, >0.3 = HMM match with a conservation score greater than 0.3, >0.7 = HMM match with a conservation score greater than 0.7. (0.06 MB XLS) [file pone.0008910.s004.xls]

## Sheet: Sheet1
							Number of conserved COUP-TF HMM hits
					Microarray Ranking*		Promoter (5000bp)			5' UTR			First intron			Expression change validated in vitro by real-time RT-PCR	Expression change validated in vivo by real-time RT-PCR	Sites validated in vitro by ChIP	Sites validated in vivo by ChIP
		Probe ID	Gene Symbol (David)	Description (David)	Genotype p-value	Fold-change	MC	>0.7	>0.3	MC	>0.7	>0.3	MC	>0.7	>0.3
	1	161750_F_AT	NCAM1	NEURAL CELL ADHESION MOLECULE 1	119	88							10	9	8
	2	103212_AT	CDCA7L	CELL DIVISION CYCLE ASSOCIATED 7 LIKE	34	31							9	5	8
	3	101469_AT	NEDD9	NEURAL PRECURSOR CELL EXPRESSED, DEVELOPMENTALLY DOWN-REGULATED GENE 9	98	94	3						5***	1	2	yes			1
	4	92958_AT	FOXO3A	FORKHEAD BOX O3A	124	159	1	1					6
	5	101515_AT	ACOX1	ACYL-COENZYME A OXIDASE 1, PALMITOYL	29	30	9	1
	6	100952_AT	STIM1	STROMAL INTERACTION MOLECULE 1	103	24				1			4	2	8		yes
	7	103575_AT	CHD4	RIKEN CDNA 9530019N15 GENE	33	34				7**	1			1
	8	161461_AT	BMP7	BONE MORPHOGENETIC PROTEIN 7	15	115	1				1		2	2	1
	9	94297_AT	FKBP5	FK506 BINDING PROTEIN 5	173	171	1						1		3		yes
	10	95731_AT	SESN1	SESTRIN 1	162	167							2		3		yes
	11	104671_AT	AMPD3	AMP DEAMINASE 3	142	96	1		1	2					1
	12	100354_AT	TBX15	T-BOX 14	9	133							2	3	1
	13	101542_F_AT	DDX3X	DEAD/H (ASP-GLU-ALA-ASP/HIS) BOX POLYPEPTIDE 3, X-LINKED	7	126	3**	1
	14	102414_I_AT	DNAJC3	DNAJ (HSP40) HOMOLOG, SUBFAMILY C, MEMBER 3	23	142							3		1
	15	98967_AT	FABP7	FATTY ACID BINDING PROTEIN 7, BRAIN	148	165	1	1								yes	yes	2****	2****
	16	92202_G_AT	ZBTB16	ZINC FINGER AND BTB DOMAIN CONTAINING 16	172	174	1								1		yes
	17	104728_AT	PROS1	PROTEIN S (ALPHA)	70	62				1	1		1	1
	18	160139_AT	HSPB8	HEAT SHOCK PROTEIN 8	125	146	1		1		1
	19	93527_AT	KLF9	KRUPPEL-LIKE FACTOR 9	151	155							1		2		yes
	20	96825_AT	TENC1	TENSIN LIKE C1 DOMAIN-CONTAINING PHOSPHATASE	72	73	3
	21	102426_AT	CASQ1	CALSEQUESTRIN 1	113	132		1				1	1			yes		2
	22	93619_AT	PER1	PERIOD HOMOLOG 1 (DROSOPHILA)	158	154	1		1							yes	yes
	23	103460_AT	DDIT4	DNA-DAMAGE-INDUCIBLE TRANSCRIPT 4	164	170	1
	24	103040_AT	CD83	CD83 ANTIGEN	117	145	1	1
	25	98108_AT	CRABP1	CELLULAR RETINOIC ACID BINDING PROTEIN I	100	122	2									yes		2
	26	96801_AT	AK1	ADENYLATE KINASE 1	105	144	1	1
	27	94352_AT	MBTD1	MBT DOMAIN CONTAINING 1	68	109	1							2***
	28	100068_AT	ALDH1A1	ALDEHYDE DEHYDROGENASE FAMILY 1, SUBFAMILY A1	157	157	1
	29	95518_AT	1810015C04RIK	RIKEN CDNA 1810015C04 GENE	69	131							2
	30	102720_AT	TEK	ENDOTHELIAL-SPECIFIC RECEPTOR TYROSINE KINASE	73	53							2		2
	31	161907_S_AT	TNXB	TENASCIN X	83	76	2**		1
	32	161853_F_AT	PRKCQ	PROTEIN KINASE C, THETA	78	80							1	1	2
	33	160613_AT	TINAGL	TUBULOINTERSTITIAL NEPHRITIS ANTIGEN-LIKE	156	58		1					1
	34	92400_AT	NDST2	N-DEACETYLASE/N-SULFOTRANSFERASE (HEPARAN GLUCOSAMINYL) 2	24	84	2	1
	35	100557_G_AT	EIF4B	EUKARYOTIC TRANSLATION INITIATION FACTOR 4B	128	45				1				1	1
	36	160832_AT	LDLR	LOW DENSITY LIPOPROTEIN RECEPTOR	138	104					2					yes	no
	37	98079_AT	CAR14	CARBONIC ANHYDRASE 14	88	82							2
	38	96704_AT	SFN	STRATIFIN	47	50	2	1
	39	95079_AT	PDGFRA	PLATELET DERIVED GROWTH FACTOR RECEPTOR, ALPHA POLYPEPTIDE	93	35	1							2
	40	101965_AT	RNF13	RING FINGER PROTEIN 13	155	40							1		2
	41	92836_AT	ELN	ELASTIN	161	61	1								1
	42	102295_AT	KCNA5	POTASSIUM VOLTAGE-GATED CHANNEL, SHAKER-RELATED SUBFAMILY, MEMBER 5	136	149					1
	43	96083_S_AT	HNRPDL	HETEROGENEOUS NUCLEAR RIBONUCLEOPROTEIN D-LIKE	127	150		1
	44	103087_AT	SULT1A1	SULFOTRANSFERASE FAMILY 1A, PHENOL-PREFERRING, MEMBER 1	175	169											yes
	45	92777_AT	CYR61	CYSTEINE RICH PROTEIN 61	75	162	1
	46	160894_AT	CEBPD	CCAAT/ENHANCER BINDING PROTEIN (C/EBP), DELTA	163	172
	47	98301_AT	TECTB	TECTORIN BETA	169	164											yes
	48	96625_AT	WDHD1	WD REPEAT AND HMG-BOX DNA BINDING PROTEIN 1	80	72				1	1
	49	94325_AT	HMGCS1	3-HYDROXY-3-METHYLGLUTARYL-COENZYME A SYNTHASE 1	165	161
	50	93957_AT	VPREB3	PRE-B LYMPHOCYTE GENE 3	129	87	1
	51	99994_AT	CIDEA	CELL DEATH-INDUCING DNA FRAGMENTATION FACTOR, ALPHA SUBUNIT-LIKE EFFEC...	153	130									1		yes
	52	94040_AT	ERH	ENHANCER OF RUDIMENTARY HOMOLOG (DROSOPHILA)	77	99	1		1
	53	103644_AT	DPEP1	DIPEPTIDASE 1 (RENAL)	160	151
	54	99598_G_AT	GNAI2	GUANINE NUCLEOTIDE BINDING PROTEIN, ALPHA INHIBITING 2	20	2			1				1	1	2***
	55	160285_AT	DHX40	DEAH (ASP-GLU-ALA-HIS) BOX POLYPEPTIDE 40	131	66							1
	56	93419_AT	1110061O04RIK	RIKEN CDNA 1110061O04 GENE	150	46				1
	57	97452_AT	H2AFY	H2A HISTONE FAMILY, MEMBER Y	171	93									1		no
	58	160319_AT	SPARCL1	SPARC-LIKE 1 (MAST9, HEVIN)	110	81	1
	59	100538_AT	SOD1	SUPEROXIDE DISMUTASE 1, SOLUBLE	97	160			1							yes		1
	60	95050_AT	CHORDC1	CYSTEINE AND HISTIDINE-RICH DOMAIN (CHORD)-CONTAINING, ZINC-BINDING PR...	114	70	1
	61	95493_AT	COL6A1	PROCOLLAGEN, TYPE VI, ALPHA 1	31	9				1	2
	62	104555_AT	MYOZ1	MYOZENIN 1	55	125		1	1
	63	161441_F_AT	TRAPPC1	TRAFFICKING PROTEIN PARTICLE COMPLEX 1	112	68	1
	64	98532_AT	CDK2AP1	CDK2 (CYCLIN-DEPENDENT KINASE 2)-ASSOCIATED PROTEIN 1	149	136
	65	160118_AT	MMP14	MATRIX METALLOPEPTIDASE 14 (MEMBRANE-INSERTED)	46	27							2
	66	103327_AT	PRRX2	PAIRED RELATED HOMEOBOX 2	41	26			1				1	1
	67	104598_AT	DUSP1	DUAL SPECIFICITY PHOSPHATASE 1	130	147
	68	100552_AT	IFNGR1	INTERFERON GAMMA RECEPTOR 1	154	121											yes
	69	102896_AT	DOK1	DOCKING PROTEIN 1	166	105
	70	97903_AT	TSEN34	TRNA SPLICING ENDONUCLEASE 34 HOMOLOG (SEN34, S. CEREVISIAE)	123	37	1
	71	103091_AT	RELB	AVIAN RETICULOENDOTHELIOSIS VIRAL (V-REL) ONCOGENE RELATED B	146	12	1
	72	101534_AT	TNP2	TRANSITION PROTEIN 2	17	139	1
	73	100130_AT	JUN	JUN ONCOGENE	170	56			1
	74	104205_AT	AGC1	AGGRECAN 1	45	75			1					1	1
	75	92981_AT	SCG2	SECRETOGRANIN II	108	152
	76	98423_AT	GJB2	GAP JUNCTION MEMBRANE CHANNEL PROTEIN BETA 2	141	116
	77	160415_AT	CLDN1	CLAUDIN 1	147	106
	78	162490_F_AT	PDCD6	PROGRAMMED CELL DEATH 6	104	143											yes
	79	95350_AT	TTR	TRANSTHYRETIN	134	113
	80	102712_AT	SAA3	SERUM AMYLOID A 3	121	123
	81	100017_AT	MYBPH	MYOSIN BINDING PROTEIN H	57	114		1
	82	99849_AT	1200016E24RIK	RIKEN CDNA 1200016E24 GENE	122	117
	83	103981_AT	U2AF1-RS2	U2 SMALL NUCLEAR RIBONUCLEOPROTEIN AUXILIARY FACTOR (U2AF) 1, RELATED ...	91	148
	84	161235_F_AT	BAT4	HLA-B ASSOCIATED TRANSCRIPT 4	21	1	1	1	1
	85	104538_AT	PTGIS	PROSTAGLANDIN I2 (PROSTACYCLIN) SYNTHASE	56	141									1
	86	96285_AT	MYADM	MYELOID-ASSOCIATED DIFFERENTIATION MARKER	144	86
	87	104716_AT	RBP1	RETINOL BINDING PROTEIN 1, CELLULAR	102	90						1
	88	96657_AT	SAT1	SPERMIDINE/SPERMINE N1-ACETYL TRANSFERASE 1	62	128			1
	89	100156_AT	MCM5	MINICHROMOSOME MAINTENANCE DEFICIENT 5, CELL DIVISION CYCLE 46 (S. CER...	79	110						1
	90	101746_I_AT	IGH-VJ558	IMMUNOGLOBULIN HEAVY CHAIN (J558 FAMILY)	85	137
	91	102048_AT	ANKRD1	ANKYRIN-LIKE REPEAT PROTEIN	87	134
	92	93765_AT	DCPP	DEMILUNE CELL AND PAROTID PROTEIN	54	166
	93	104628_AT	MAN2A1	MANNOSIDASE 2, ALPHA 1	107	77									1
	94	94805_F_AT	HIST1H2AG	HYPOTHETICAL PROTEIN 1190022L06	64	48	1
	95	95617_AT	RBL2	RETINOBLASTOMA-LIKE 2	106	111
	96	96033_AT	SDC1	SYNDECAN 1	116	29			1			1					no
	97	95286_AT	CLU	CLUSTERIN	92	118
	98	104300_AT	IQGAP1	IQ MOTIF CONTAINING GTPASE ACTIVATING PROTEIN 1	159	10			1
	99	101561_AT	MT2	METALLOTHIONEIN 2	42	158
	100	94807_AT	SLC25A1	SOLUTE CARRIER FAMILY 25 (MITOCHONDRIAL CARRIER, CITRATE TRANSPORTER),...	126	74
	101	93122_AT	CRISP1	CYSTEINE-RICH SECRETORY PROTEIN 1	120	78
	102	99985_AT	TXNRD1	THIOREDOXIN REDUCTASE 1	36	21							1		1
	103	97322_AT	MS4A6B	MEMBRANE-SPANNING 4-DOMAINS, SUBFAMILY A, MEMBER 6B	76	120
	104	101965_AT	TOMM22	RING FINGER PROTEIN 13	155	40
	105	101484_AT	NBR1	NEIGHBOR OF BRCA1 GENE 1	84	107
	106	95426_AT	ECHS1	ENOYL COENZYME A HYDRATASE, SHORT CHAIN, 1, MITOCHONDRIAL	152	38
	107	160937_AT	CRYM	CRYSTALLIN, MU	61	127
	108	94322_AT	SQLE	SQUALENE EPOXIDASE	59	129
	109	101254_AT	RAN	RAN, MEMBER RAS ONCOGENE FAMILY	118	69
	110	100116_AT	2810417H13RIK	RIKEN CDNA 2810417H13 GENE	58	124
	111	102370_AT	DHRS8	DEHYDROGENASE/REDUCTASE (SDR FAMILY) MEMBER 8	53	57		1
	112	161441_F_AT	NA	,CLUSTER INCL AV350341:AV350341 MUS MUSCULUS CDNA, 3' END /CLONE=65304	112	68
	113	94971_AT	CDKN3	CYCLIN-DEPENDENT KINASE INHIBITOR 3	140	39
	114	101676_AT	GPX3	GLUTATHIONE PEROXIDASE 3	44	135
	115	101995_AT	SQSTM1	SEQUESTOSOME 1	30	43	1
	116	104252_AT	AU020206	EXPRESSED SEQUENCE AU020206	94	83
	117	94438_AT	PFKM	PHOSPHOFRUCTOKINASE, MUSCLE	35	71								1
	118	98772_AT	CXCL5	CHEMOKINE (C-X-C MOTIF) LIGAND 5	38	138
	119	99444_AT	RAMP2	RECEPTOR (CALCITONIN) ACTIVITY MODIFYING PROTEIN 2	49	20	1
	120	101975_AT	DLK1	DELTA-LIKE 1 HOMOLOG (DROSOPHILA)	133	36
	121	98053_AT	YWHAB	TYROSINE 3-MONOOXYGENASE/TRYPTOPHAN 5-MONOOXYGENASE ACTIVATION PROTEIN...	19	79								1
	122	100476_AT	IBSP	INTEGRIN BINDING SIALOPROTEIN	65	67						1
	123	102817_AT	U2AF1-RS1	U2 SMALL NUCLEAR RIBONUCLEOPROTEIN AUXILIARY FACTOR (U2AF) 1, RELATED ...	63	102
	124	101351_AT	LOC333201	SIMILAR TO PUTATIVE PHEROMONE RECEPTOR (GO-VN5)	43	119
	125	160074_AT	DDC	DOPA DECARBOXYLASE	135	25
	126	96779_F_AT	2410022L05RIK	RIKEN CDNA 2410022L05 GENE	18	140
	127	92223_AT	C1QC	COMPLEMENT COMPONENT 1, Q SUBCOMPONENT, C CHAIN	50	108
	128	160255_AT	AHNAK	AHNAK NUCLEOPROTEIN (DESMOYOKIN)	26	95									1
	129	160965_AT	RASA4	RAS P21 PROTEIN ACTIVATOR 4	143	13
	130	161735_R_AT	5730469M10RIK	RIKEN CDNA 5730469M10 GENE	51	101
	131	94916_AT	CYP51	CYTOCHROME P450, FAMILY 51	67	85
	132	98910_AT	LOC545968	HYPOTHETICAL LOC545968	145	6
	133	95036_AT	CALB2	CALBINDIN 2	52	97
	134	100828_AT	MYL4	MYOSIN, LIGHT POLYPEPTIDE 4	10	33		1							1
	135	161678_AT	INPP5D	INOSITOL POLYPHOSPHATE-5-PHOSPHATASE D	82	64
	136	93866_S_AT	MGP	MATRIX GLA PROTEIN	90	54
	137	95436_AT	SST	SOMATOSTATIN	81	59
	138	98562_AT	C1QA	COMPLEMENT COMPONENT 1, Q SUBCOMPONENT, ALPHA POLYPEPTIDE	27	112
	139	103575_AT	NEFL	NEUROFILAMENT, LIGHT POLYPEPTIDE	33	34		1
	140	160511_AT	CXCL12	CHEMOKINE (C-X-C MOTIF) LIGAND 12	2	100									1
	141	101058_AT	AMY1	AMYLASE 1, SALIVARY	37	63									1
	142	94001_AT	ELAVL1	ELAV (EMBRYONIC LETHAL, ABNORMAL VISION, DROSOPHILA)-LIKE 1 (HU ANTIGE...	86	14			1
	143	97114_AT	PSAP	PROSAPOSIN	111	22
	144	102201_S_AT	PSEN1	PRESENILIN 1	101	32
	145	160211_AT	YIPF3	YIP1 DOMAIN FAMILY, MEMBER 3	6	18				1
	146	93740_AT	YBX1	Y BOX PROTEIN 1	14	7							1
	147	97248_AT	DBI	DIAZEPAM BINDING INHIBITOR	71	51
	148	160449_AT	DR1	DOWN-REGULATOR OF TRANSCRIPTION 1	60	60
	149	101207_AT	PPIA	PEPTIDYLPROLYL ISOMERASE A	115	4
	150	95556_AT	MRPL45	MITOCHONDRIAL RIBOSOMAL PROTEIN L45	89	28
	151	93736_AT	TCN2	TRANSCOBALAMIN 2	3	8		1	1
	152	162221_I_AT	BLMH	BLEOMYCIN HYDROLASE	12	103
	153	98878_R_AT	AAAS	ACHALASIA, ADRENOCORTICAL INSUFFICIENCY, ALACRIMIA	95	19
	154	95717_AT	ELP3	ELONGATION PROTEIN 3 HOMOLOG (S. CEREVISIAE)	99	15
	155	97254_AT	RBM8A	RNA BINDING MOTIF PROTEIN 8A	48	65
	156	93236_S_AT	TYMS	THYMIDYLATE SYNTHASE	66	47											no
	157	94805_F_AT	HIST1H2AB	HYPOTHETICAL PROTEIN 1190022L06	64	48
	158	94805_F_AT	HIST1H2AC	HYPOTHETICAL PROTEIN 1190022L06	64	48
	159	94805_F_AT	HIST1H2AD	HYPOTHETICAL PROTEIN 1190022L06	64	48
	160	94805_F_AT	HIST1H2AE	HYPOTHETICAL PROTEIN 1190022L06	64	48
	161	94805_F_AT	HIST1H2AH	HISTONE 1, H2AH	64	48
	162	94805_F_AT	HIST1H2AI	HYPOTHETICAL PROTEIN 1190022L06	64	48
	163	94805_F_AT	HIST1H2AK	HISTONE 1, H2AK	64	48
	164	94805_F_AT	HIST1H2AN	HYPOTHETICAL PROTEIN 1190022L06	64	48
	165	94805_F_AT	HIST1H2AO	HYPOTHETICAL PROTEIN 1190022L06	64	48
	166	94805_F_AT	HIST3H2A	RIKEN CDNA 4930534G10 GENE	64	48
	167	95665_AT	SEC14L1	SEC14-LIKE 1 (S. CEREVISIAE)	25	11		1
	168	95441_AT	TIMM23	TRANSLOCASE OF INNER MITOCHONDRIAL MEMBRANE 23 HOMOLOG (YEAST)	8	91
	169	92413_AT	FOXK2	FORKHEAD BOX K2	4	92
	170	100037_AT	DDX18	DEAD (ASP-GLU-ALA-ASP) BOX POLYPEPTIDE 18	39	52
	171	101081_AT	CTBP1	C-TERMINAL BINDING PROTEIN 1	28	16									1
	172	98084_AT	ARL2BP	RIKEN CDNA 1700027H16 GENE	74	3
	173	96608_AT	PHYH	PHYTANOYL-COA HYDROXYLASE	16	55
	174	103575_AT	NA	,CLUSTER INCL M55424:MOUSE NEUROFILAMENT PROTEIN (NF-L) GENE, PROMOTER	33	34
	175	94305_AT	COL1A1	PROCOLLAGEN, TYPE I, ALPHA 1	22	41
	176	92401_AT	LTC4S	LEUKOTRIENE C4 SYNTHASE	40	23
	177	96766_S_AT	TYRO3	TYRO3 PROTEIN TYROSINE KINASE 3	13	49
	178	104059_AT	CHD8	CHROMODOMAIN HELICASE DNA BINDING PROTEIN 8	32	17
	179	92615_AT	NDUFB6	NADH DEHYDROGENASE (UBIQUINONE) 1 BETA SUBCOMPLEX, 6	5	44
	180	99552_AT	SNAI2	SNAIL HOMOLOG 2 (DROSOPHILA)	1	42
	181	161235_F_AT	LOC434585	SIMILAR TO PROTEIN BAT4 (HLA-B-ASSOCIATED TRANSCRIPT 4) (G5)	21	1
	182	98886_AT	2810410M20RIK	RIKEN CDNA 2810410M20 GENE	11	5
		SUM					49	19	17	9	10	5	58	33	58	7	12	5	1
		* Microarray Ranking range from 1-175, higher ranking with lower gentoype p-value or greater fold-change.
		** Corresponds to a late transcription start site.
		*** Sites distributed in first intron of different transcipts, or in the first intron of a particular splice variant.
		****Sites closely spaced, cannot be analyzed individually at the resolution of chromatin enzymatic shearing.
		MC = Sites within a PhastCons Most Conserved element (UCSC)
		>0.7 = Sites with a conservation score greater than 0.7 (UCSC)
		>0.3 = Sites with a conservation score greater than 0.3 (UCSC)
		ChIP = chromatin immunoprecipitation
		in vitro = experiment performed in cell culture model, mainly wild-type and COUP-TFI-/- mouse embryonic fibroblasts
		in vivo = experiment performed in newborn inner ears or newborn brain cortex
		Expression change validation = real-time RT-PCR, n>=4, p<0.05
